# Supplementary figures and images for: Gastrointestinal digestion of dietary advanced glycation endproducts using anin vitromodel of the gastrointestinal tract (TIM-1)
Source: Royal Society of Chemistry journal article supplement (doi:10.1039/d0fo00450b), 2020-01-01

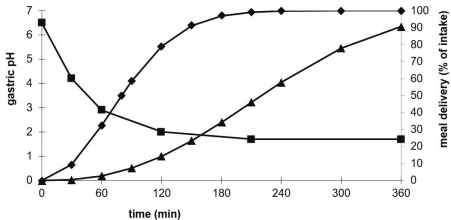

Supplement: d0fo00450b3.pdf [file d0fo00450b3.pdf]
